# Supplementary material for: Targeted Silencing of MLL5β Inhibits Tumor Growth and Promotes Gamma-Irradiation Sensitization in HPV16/18-Associated Cervical Cancers
Source: Oxford University Press journal article supplement (doi:10.1158/1535-7163.mct-14-0019), 2014-08-29
Supplement: 15357163mct140019-sup-125287_2_supp_2562955_n8qgjy.doc [file 15357163mct140019-sup-125287_2_supp_2562955_n8qgjy.doc]

**Supplementary Table 1: Sequences of siRNAs used.**

| **siRNA ID** | **siRNA sequences (5’-3’)** |
| --- | --- |
| **SC (scrambled)** | **Sense** UUCUCCGAACGUGUCACGUdTdT  **Antisens**e ACGUCACACGUUCGGAGAAdTdT |
|  |  |
| **MLL5β** | **Sense** GACUAGUCUCGCGUAUAUUdTdT  **Antisense** AAUAUACGCGAGACUAGUCdTdT |
|  |  |
| **HPV16 E6** | **Sense** GAGGUAUAUGACUUUGCUUdTdT  **Antisense** AAGCAAAGUCAUAUACCUCdTdT |
|  |  |
| **HPV16 E7** | **Sense** AGGAGGAUGAAAUAGAUGGdTdT  **Antisense** CCAUCUAUUUCAUCCUCCUdTdT |
|  |  |
| **HPV18 E6** | **Sense** CACUUCACUGCAAGACAUAdTdT  **Antisense** UAUGUCUUGCAGUGAAGUGdTdT |
|  |  |
| **HPV18 E7** | **Sense** CCACAACGUCACACAAUGUdTdT  **Antisense** ACAUUGUGUGACGUUGUGGdTdT |
